# Supplementary material for: A genomic case study of desmoplastic small round cell tumor: comprehensive analysis reveals insights into potential therapeutic targets and development of a monitoring tool for a rare and aggressive disease
Source: PubMed Central journal article supplement (PMC5116179; doi:10.1186/s40246-016-0092-0), 2016-11-18
Supplement: 40246_2016_92_MOESM7_ESM.pdf [file 40246_2016_92_MOESM7_ESM.pdf]

## Path Designer Shapes

-  Cytokine / Growth Factor
-  Drug
-  Chemical / Toxicant
-  Enzyme
-  G-protein Coupled Receptor
-  Ion Channel
-  Kinase
-  Ligand-dependent Nuclear Receptor
-  Peptidase
-  Phosphatase
-  Transcription Regulator
-  Translation Regulator
-  Transmembrane Receptor
-  Transporter
-  microRNA
-  Complex / Group
-  Other
